# Supplementary material
Source: PubMed Central journal article supplement (PMC1459382)

TIG3/TS+vector

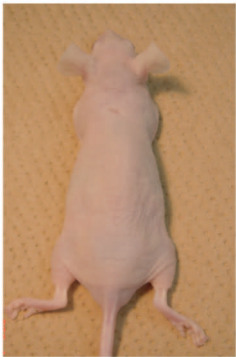

TIG3/TS+HA-Fra1

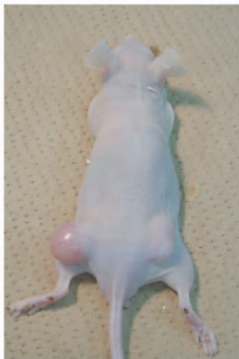

Supplement: pnas_0601222103_1.pdf [file pnas_0601222103_1.pdf]
